# Supplementary material for: Otx-dependent expression of proneural bHLH genes establishes a neuronal bilateral asymmetry inC. elegans
Source: Oxford University Press journal article supplement (doi:10.1242/dev.058834), 2010-11-02
Supplement: dev058834figs2.pdf [file dev058834figs2.pdf]

|                       |    | basic |   |   |   |   |   |   |   |   |   | helix 1 |   |   |   |   |   |   |   |   |   |   |   |   |   |   |   |   |   |
|-----------------------|----|-------|---|---|---|---|---|---|---|---|---|---------|---|---|---|---|---|---|---|---|---|---|---|---|---|---|---|---|---|
| <i>C.e.</i> NGN-1     | 63 | R     | R | D | K | A | N | A | R | E | R | R       | R | M | N | S | L | N | D | A | L | E | H | L | R | G | I | L | P |
| <i>X. t.</i> neurog 1 | 76 | R     | R | V | K | A | N | D | R | E | R | N       | R | M | H | N | L | N | S | A | L | D | E | L | R | G | I | L | P |
| <i>D. r.</i> Neurog 1 | 71 | R     | R | L | K | A | N | D | R | E | R | N       | R | M | H | N | L | N | D | A | L | D | A | L | R | S | V | L | P |
| <i>M. m.</i> NEUROG 3 | 84 | R     | R | K | K | A | N | D | R | E | R | N       | R | M | H | N | L | N | S | A | L | D | A | L | R | G | V | L | P |

|                       |  | loop |   |   |   |   |   | helix 2 |   |   |   |   |   |   |   |   |   |   |   |   |   |   |   |   |   |   |     |
|-----------------------|--|------|---|---|---|---|---|---------|---|---|---|---|---|---|---|---|---|---|---|---|---|---|---|---|---|---|-----|
| <i>C.e.</i> NGN-1     |  | A    | L | P | D | E | P | K       | M | T | K | I | E | T | L | R | K | A | Q | E | Y | I | A | S | L | S | 116 |
| <i>X. t.</i> neurog 1 |  | S    | F | P | D | D | T | K       | L | T | K | I | E | T | L | R | L | A | H | N | Y | I | W | A | L | S | 128 |
| <i>D. r.</i> Neurog 1 |  | A    | F | P | D | D | T | K       | L | T | K | I | E | T | L | R | F | A | H | N | Y | I | W | A | L | S | 123 |
| <i>M. m.</i> NEUROG 3 |  | T    | F | P | D | D | A | K       | L | T | K | I | E | T | L | R | F | A | H | N | Y | I | W | A | L | T | 136 |
