# Supplementary material for: Otx-dependent expression of proneural bHLH genes establishes a neuronal bilateral asymmetry inC. elegans
Source: Oxford University Press journal article supplement (doi:10.1242/dev.058834), 2010-11-02
Supplement: dev058834tables1.pdf [file dev058834tables1.pdf]

**Table S1. Rescue experiments by *ngn-1* and *hlh-2* transgenes****(A) Rescue of *ngn-1(n1921)* by *ngn-1* transgenes**

| Genotype                                    | % animals missing MI* | <i>n</i> |
|---------------------------------------------|-----------------------|----------|
| Wild type                                   | 0                     | 50       |
| <i>ngn-1(n1921)</i>                         | 96                    | 50       |
| <i>ngn-1(n1921); nEx[ngn-1(+)]</i>          | 8                     | 50       |
| <i>ngn-1(n1921); nEx[ngn-1(frameshift)]</i> | 94                    | 50       |
| <i>ngn-1(n1921); nls[ngn-1::gfp]</i>        | 4                     | 50       |

**(B) Rescue of *hlh-2(n5053)* by *hlh-2* transgenes**

| Genotype                                                  | % animals missing MI* | <i>n</i> |
|-----------------------------------------------------------|-----------------------|----------|
| Wild type                                                 | 0                     | 50       |
| <i>hlh-2(n5053)/+<sup>†</sup></i>                         | 32                    | 50       |
| <i>hlh-2(n5053)/+; nEx[hlh-2(+)]<sup>†</sup></i>          | 0                     | 50       |
| <i>hlh-2(n5053)/+; nEx[hlh-2(frameshift)]<sup>†</sup></i> | 26                    | 50       |
| <i>hlh-2(n5053)/+; nls[hlh-2::gfp]<sup>†</sup></i>        | 0                     | 50       |

**(C) Rescue of embryonic lethality in *hlh-2(n5053)* mutants by the *hlh-2* transgenes**

| Transgene present in the parent of <i>dpy-5(e61) hlh-2(n5053)</i> | % Dpy Unc progeny <sup>‡</sup> | <i>n</i> |
|-------------------------------------------------------------------|--------------------------------|----------|
| <i>unc-13(e51)/+++</i>                                            |                                |          |
| No transgene                                                      | 0                              | 647      |
| <i>nEx[hlh-2(+)]</i>                                              | 12                             | 348      |
| <i>nEx[hlh-2(frameshift)]</i>                                     | 0                              | 313      |
| <i>nls[hlh-2::gfp]</i>                                            | 18                             | 296      |

\*The presence or absence of the MI neuron was determined using Nomarski microscopy.

<sup>†</sup>We allowed hermaphrodites of genotype *dpy-5(e61) ++ unc-55(e1170)/+ hlh-2(n5053) unc-13(e51) +* with or without each transgene to self-fertilize and determined their Non-Dpy non-Unc progeny.

<sup>‡</sup>We allowed hermaphrodites of genotype *dpy-5(e61) hlh-2(n5053) unc-13(e51)/+++* with or without each transgene to self-fertilize and determined the fraction of Dpy Unc progeny.
