# Supplementary material for: Otx-dependent expression of proneural bHLH genes establishes a neuronal bilateral asymmetry inC. elegans
Source: Oxford University Press journal article supplement (doi:10.1242/dev.058834), 2010-11-02
Supplement: dev058834tables2.pdf [file dev058834tables2.pdf]

**Table S2. RNA interference of *ngn-1* and *hlh-2* cause symmetry in a normally asymmetric cell lineage**

| Genotype*                         | % animals missing MI <sup>†</sup> | <i>n</i> |
|-----------------------------------|-----------------------------------|----------|
| <i>vector(RNAi)</i>               | 0                                 | 50       |
| <i>hlh-2(RNAi)</i>                | 62                                | 100      |
| <i>eri-1(mg366); vector(RNAi)</i> | 0                                 | 50       |
| <i>eri-1(mg366); ngn-1(RNAi)</i>  | 92                                | 100      |

\*The wild-type or *eri-1(mg366)* strain was grown on bacteria expressing the double-stranded RNA, and the presence or absence of the MI neuron in their progeny was scored using Nomarski microscopy.

<sup>†</sup>The presence or absence of the MI neuron was determined using Nomarski microscopy.
