# Supplementary material for: Otx-dependent expression of proneural bHLH genes establishes a neuronal bilateral asymmetry inC. elegans
Source: Oxford University Press journal article supplement (doi:10.1242/dev.058834), 2010-11-02
Supplement: dev058834tables3.pdf [file dev058834tables3.pdf]

**Table S3. Mutations in *lin-12* and *glp-1* do not affect the MI-e3D bilateral asymmetry**

| Genotype                        | % MI or e3D absent* | <i>n</i> |
|---------------------------------|---------------------|----------|
| Wild type                       | 0                   | 50       |
| <i>lin-12(n137sd)</i>           | 0                   | 50       |
| <i>lin-12(n941)<sup>†</sup></i> | 0                   | 30       |
| <i>glp-1(e2141)</i>             | 0                   | 30       |

\*The presence or absence of MI and e3D was determined using Nomarski microscopy.

<sup>†</sup>To score these animals, we allowed hermaphrodites of genotype *pop-1/hT2[qls48]* and *lin-12/hT2[qls48]* to self-fertilize and examined their *myo-2::gfp*-negative progeny.
