# Supplementary material for: Otx-dependent expression of proneural bHLH genes establishes a neuronal bilateral asymmetry inC. elegans
Source: Oxford University Press journal article supplement (doi:10.1242/dev.058834), 2010-11-02
Supplement: dev058834tables4.pdf [file dev058834tables4.pdf]

**Table S4. Rescue experiments demonstrating that *ceh-36* is required to break left-right symmetry in the cell lineage**

| Genotype                                      | % animals missing MI* | <i>n</i> |
|-----------------------------------------------|-----------------------|----------|
| Wild type                                     | 0                     | 50       |
| <i>ceh-36(n5333)</i>                          | 96                    | 50       |
| <i>ceh-36(n5333); nEx[ceh-36(+)]</i>          | 4                     | 50       |
| <i>ceh-36(n5333); nEx[ceh-36(frameshift)]</i> | 96                    | 50       |
| <i>ceh-36(n5333); nls[ceh-36::gfp]</i>        | 4                     | 50       |

\*The presence or absence of the MI neuron was determined using Nomarski microscopy.
