# Supplementary material for: Otx-dependent expression of proneural bHLH genes establishes a neuronal bilateral asymmetry inC. elegans
Source: Oxford University Press journal article supplement (doi:10.1242/dev.058834), 2010-11-02
Supplement: dev058834tables5.pdf [file dev058834tables5.pdf]

**Table S5. Candidate-gene approaches did not identify genes required to establish the bilateral asymmetry in the ABaraap cell lineage**

**(A) Mutations affecting the ASE bilateral asymmetry do not affect the MI-e3D asymmetry**

| Genotype             | % MI or e3D absent* | <i>n</i> |
|----------------------|---------------------|----------|
| Wild type            | 0                   | 50       |
| <i>cog-1(ot28)</i>   | 0                   | 50       |
| <i>lim-6(nr2073)</i> | 0                   | 50       |
| <i>lin-49(sa470)</i> | 0                   | 50       |
| <i>lsy-6(ot71)</i>   | 0                   | 50       |

**(B) Mutations affecting the AWC bilateral asymmetry do not affect the MI-e3D asymmetry**

| Genotype                  | % MI or e3D absent* | <i>n</i> |
|---------------------------|---------------------|----------|
| Wild type                 | 0                   | 50       |
| <i>inx-19(ky634)</i>      | 0                   | 50       |
| <i>nsy-4(ky616)</i>       | 0                   | 50       |
| <i>unc-43(n498 n1186)</i> | 0                   | 50       |
| <i>unc-43(n498sd)</i>     | 0                   | 50       |

\*The presence or absence of MI and e3D was determined using Nomarski microscopy.
