# Supplementary figures and images for: Otx-dependent expression of proneural bHLH genes establishes a neuronal bilateral asymmetry inC. elegans
Source: Oxford University Press journal article supplement (doi:10.1242/dev.058834), 2010-11-02

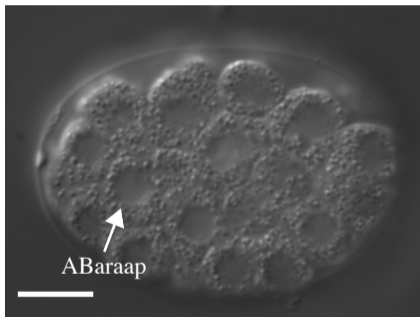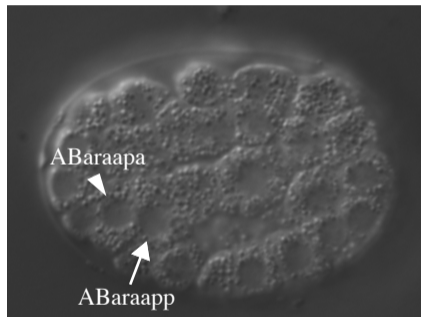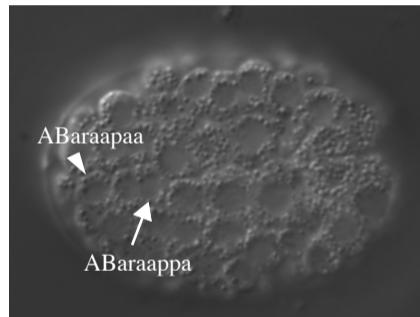

Supplement: dev058834figs1.pdf [file dev058834figs1.pdf]

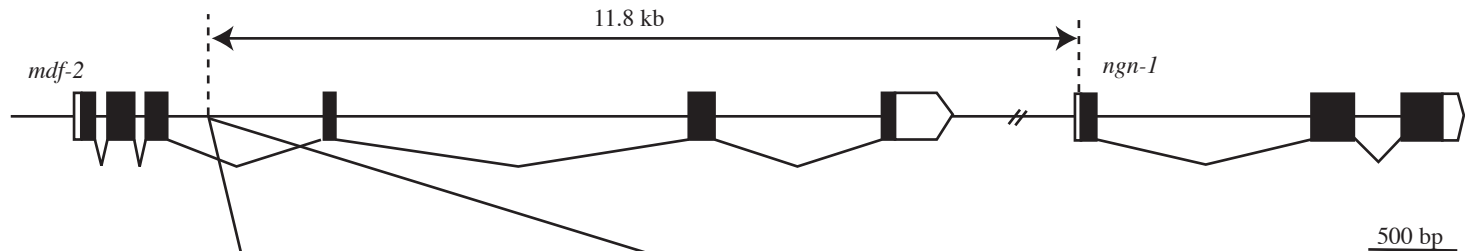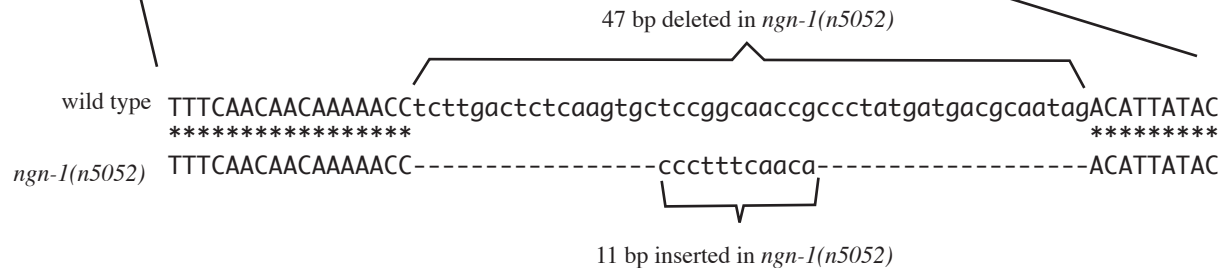

Supplement: dev058834figs3.pdf [file dev058834figs3.pdf]

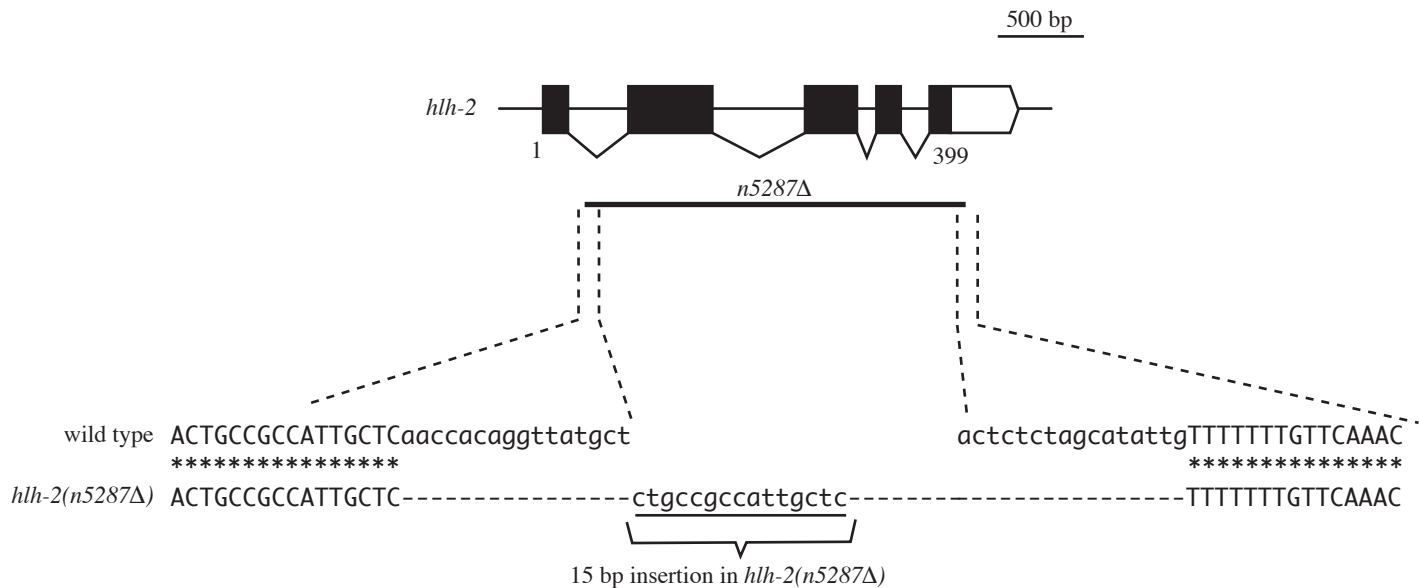

Supplement: dev058834figs4.pdf [file dev058834figs4.pdf]
